# Supplementary material for: Minimal Access vs Conventional Nipple-Sparing Mastectomy
Source: PubMed Central journal article supplement (PMC11325243; doi:10.1001/jamasurg.2024.2977), 2024-08-14
Supplement: jamasurg-e242977-s001.pdf [file jamasurg-e242977-s001.pdf]

## Supplemental Online Content

Kim JH, Ryu JM, Bae SJ, et al; the Korea Robot-endoscopy Minimal Access Breast Surgery Study Group. Minimal access vs conventional nipple-sparing mastectomy. *JAMA Surg*. Published online August 14, 2024. doi:10.1001/jamasurg.2024.2977

**eFigure 1.** Scoring system (A-F) for the degree of nipple or areolar necrosis after nipple-sparing mastectomy.

**eFigure 2.** Scoring system for degree of skin necrosis after nipple-sparing mastectomy based on the involved area and depth of skin necrosis.

**eTable.** Comparison of patients who underwent conventional nipple-sparing mastectomy (C-NSM) using inframammary fold (IMF) incision or minimal-access NSM (M-NSM)

This supplemental material has been provided by the authors to give readers additional information about their work.

**eFigure 1. Scoring system (A-F) for the degree of nipple or areolar necrosis after nipple-sparing mastectomy.**

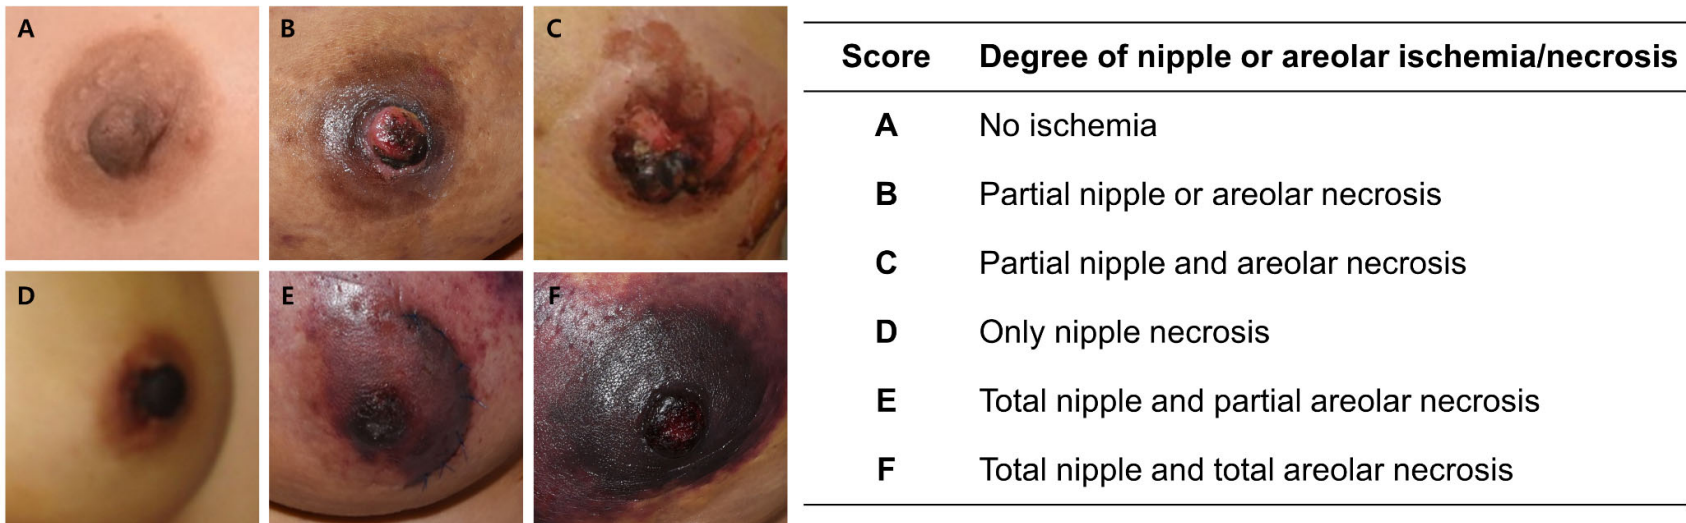

**eFigure 2. Scoring system for degree of skin necrosis after nipple-sparing mastectomy based on the involved area and depth of skin necrosis.**

| Score | Area (%) | Degree | Depth of skin necrosis                                     |
|-------|----------|--------|------------------------------------------------------------|
| 0     | <1       | A      | No evidence of skin necrosis                               |
| 1     | 1-10     | B      | Only bruising due to impaired perfusion or ischemic injury |
| 2     | 11-30    | C      | Partial thickness of skin necrosis                         |
| 3     | >30      | D      | Full thickness of skin necrosis                            |

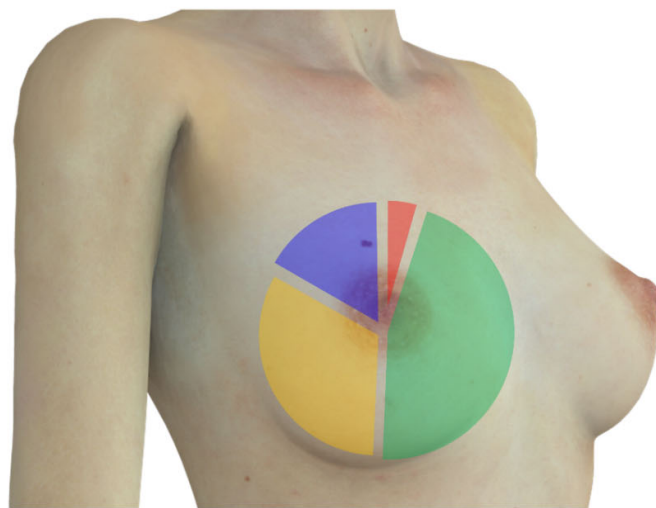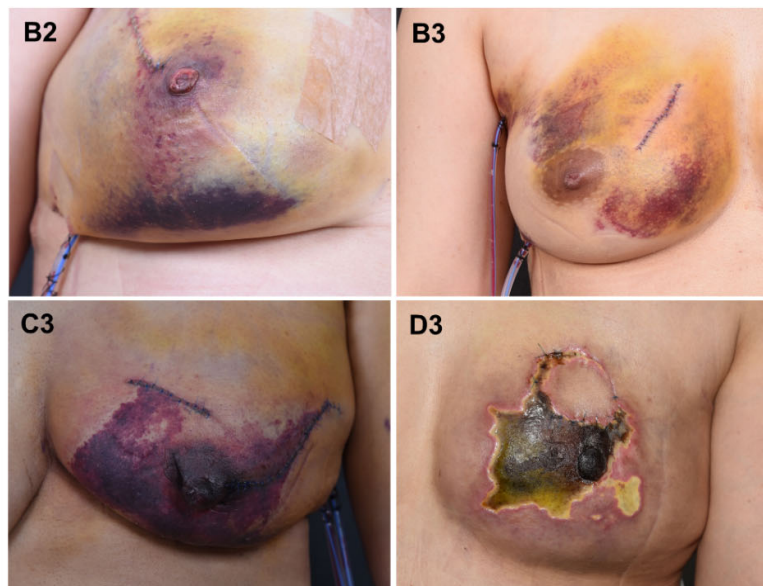

**eTable 1. Comparison of patients who underwent conventional nipple-sparing mastectomy (C-NSM) using inframammary fold (IMF) incision or minimal-access NSM (M-NSM)**

| C-NSM using IMF incision (N=332) | M-NSM (N=227) | P-value |
|----------------------------------|---------------|---------|
|----------------------------------|---------------|---------|

| Postoperative complications           |                      | Mean or Frequency | SD <sup>a</sup> or % | Mean or Frequency | SD or % |        |
|---------------------------------------|----------------------|-------------------|----------------------|-------------------|---------|--------|
| Breast skin flap necrosis             | A                    | 315               | 94.88                | 211               | 92.95   | .0821  |
|                                       | B                    | 3                 | 0.90                 | 4                 | 1.76    |        |
|                                       | C                    | 7                 | 2.11                 | 10                | 4.41    |        |
|                                       | D                    | 5                 | 1.51                 | 0                 | 0.00    |        |
|                                       | Unknown              | 2                 | 0.60                 | 2                 | 0.88    |        |
| Nipple-areolar complex necrosis       | No ischemia          | 317               | 95.48                | 200               | 88.11   | .6300  |
|                                       | Ischemia or necrosis | 7                 | 2.11                 | 5                 | 2.20    |        |
|                                       | Unknown              | 8                 | 2.41                 | 22                | 9.69    |        |
| Breast infection                      | No                   | 329               | 99.1                 | 208               | 91.63   | <.0001 |
|                                       | Minor infection      | 0                 | 0.00                 | 13                | 5.73    |        |
|                                       | Severe infection     | 2                 | 0.60                 | 5                 | 2.20    |        |
|                                       | Unknown              | 1                 | 0.30                 | 1                 | 0.44    |        |
| Postoperative bleeding                | No                   | 321               | 96.69                | 222               | 97.80   | .4631  |
|                                       | Yes                  | 9                 | 2.71                 | 4                 | 1.76    |        |
|                                       | Unknown              | 2                 | 0.60                 | 1                 | 0.44    |        |
| Hematoma                              | No                   | 320               | 96.39                | 220               | 96.92   | .7338  |
|                                       | Yes                  | 12                | 3.61                 | 7                 | 3.08    |        |
|                                       | Unknown              | 0                 | 0.00                 | 0                 | 0.00    |        |
| Postoperative seroma                  | No                   | 287               | 86.45                | 205               | 90.31   | .1487  |
|                                       | Yes                  | 44                | 13.25                | 21                | 9.25    |        |
|                                       | Unknown              | 1                 | 0.30                 | 1                 | 0.44    |        |
| Duration of seroma formation (days)   |                      | 18.79             | 17.41                | 13.93             | 26.61   | .5315  |
| Total volume of aspirated seroma (mL) |                      | 86.73             | 107.62               | 60.80             | 53.00   | .2373  |
| Implant loss                          | No                   | 322               | 96.99                | 221               | 97.36   | .7076  |

|                            |         |       |       |       |       |        |
|----------------------------|---------|-------|-------|-------|-------|--------|
|                            | Yes     | 9     | 2.71  | 5     | 2.20  |        |
|                            | Unknown | 1     | 0.30  | 1     | 0.44  |        |
| Initial incision size (mm) |         | 52.52 | 6.62  | 45.33 | 11.49 | <.0001 |
| Final incision size (mm)   |         | 83.62 | 13.16 | 48.61 | 11.89 | <.0001 |

\*SD, standard deviation
