# Supplementary material for: Minimal Access vs Conventional Nipple-Sparing Mastectomy
Source: PubMed Central journal article supplement (PMC11325243; doi:10.1001/jamasurg.2024.2977), 2024-08-14
Supplement: jamasurg-e242977-s002.pdf [file jamasurg-e242977-s002.pdf]

Supplemental Online Content: Nonauthor Collaborators

\*First name, last name, and suffix (if applicable) are required and will appear in PubMed.

| <b>*Group Name(s): Korea Robot-endoscopy Minimal Access Breast Surgery Study Group (KoREa-BSG)</b> |                   |                          |                         |                                                                                     |                                                 |                                                   |                                                                                                   |
|----------------------------------------------------------------------------------------------------|-------------------|--------------------------|-------------------------|-------------------------------------------------------------------------------------|-------------------------------------------------|---------------------------------------------------|---------------------------------------------------------------------------------------------------|
| <b>*First Name and Middle</b>                                                                      | <b>*Last Name</b> | <b>*Suffix (eg, Jr,)</b> | <b>Academic Degrees</b> | <b>Institution</b>                                                                  | <b>Location (city, state/province, country)</b> | <b>Role or Contribution, eg, chair, principal</b> | <b>Group (if more than 1 Group listed in the byline) and/or Subgroup (eg, Steering Committee)</b> |
| Jeea                                                                                               | Lee               |                          | MD                      | Department of Surgery, Uijeongbu Eulji Medical Center, Eulji University             | Uijeongbu, Republic of Korea                    | principal investigator                            | Korea Robot-endoscopy Minimal Access Breast Surgery Study Group (KoREa-BSG)                       |
| Sae Byul                                                                                           | Lee               |                          | MD, PhD                 | Department of Surgery, University of Ulsan College of Medicine, Asan Medical Center | Seoul, Republic of Korea                        | principal investigator                            | Korea Robot-endoscopy Minimal Access Breast Surgery Study Group (KoREa-BSG)                       |
| Young Woo                                                                                          | Chang             |                          | MD, PhD                 | Division of Breast and Endocrine Surgery, Department of Surgery, Korea University   | Ansan, Republic of Korea                        | principal investigator                            | Korea Robot-endoscopy Minimal Access Breast Surgery Study Group (KoREa-BSG)                       |
| Jee Ye                                                                                             | Kim               |                          | MD, PhD                 | Division of Breast Surgery, Department of Surgery, Yonsei University College of     | Seoul, Republic of Korea                        | principal investigator                            | Korea Robot-endoscopy Minimal Access Breast Surgery Study Group (KoREa-BSG)                       |
