# Supplementary material for: Minimal Access vs Conventional Nipple-Sparing Mastectomy
Source: PubMed Central journal article supplement (PMC11325243; doi:10.1001/jamasurg.2024.2977), 2024-08-14
Supplement: jamasurg-e242977-s003.pdf [file jamasurg-e242977-s003.pdf]

## Data Sharing Statement

Kim. Minimal Access vs Conventional Nipple-Sparing Mastectomy. *JAMA Surg.* Published August 14, 2024. doi:10.1001/jamasurg.2024.2977

### Data

**Data available:** Yes

**Data types:** Deidentified participant data

**How to access data:** The datasets are available from the corresponding author ([j.lee@knu.ac.kr](mailto:j.lee@knu.ac.kr)) upon reasonable request.

**When available:** With publication

### Supporting Documents

**Document types:** None

### Additional Information

**Who can access the data:** The datasets generated and/or analyzed during the current study are not publicly available. However, they are available from the corresponding author ([j.lee@knu.ac.kr](mailto:j.lee@knu.ac.kr)) upon reasonable request.

**Types of analyses:** Only research purpose

**Mechanisms of data availability:** after approval of a proposal
